# 1 **Where to learn to flatten the curve: a modelling study**

2 Matthew J Silk, Ph.D<sup>1,2,3</sup>, Simon Carrignon, Ph.D<sup>4,5,6</sup>, R. Alexander Bentley, Ph.D<sup>4,5</sup>, Nina H  
3 Fefferman, Ph.D<sup>3,7</sup>

4 <sup>1</sup> Centre for Ecology and Conservation, University of Exeter Penryn Campus, UK

5 <sup>2</sup> Environment and Sustainability Institute, University of Exeter, Exeter, UK

6 <sup>3</sup> National Institute for Mathematical and Biological Synthesis (NIMBioS), University of Tennessee, TN, USA

7 <sup>4</sup> Center for the Dynamics of Social Complexity (DySoC), University of Tennessee, Knoxville, TN, US

8 <sup>5</sup> Department of Anthropology, University of Tennessee, Knoxville, TN, US

9 <sup>6</sup> School of Information Science, University of Tennessee, Knoxville, TN, US

10 <sup>7</sup> Dept.s of Ecology and Evolutionary Biology & Mathematics, University of Tennessee, Knoxville, TN, USA

11  
12 **Corresponding Author:** N.H. Fefferman, Department of Ecology and Evolutionary Biology, 447  
13 Hesler Biology Building, University of Tennessee, Knoxville, 37996, nfefferm@utk.edu, +1 781  
14 710 5025

15

## 16 **Abstract**

17 Background: Individual behavioural decisions are responses to both a person's perceived  
18 social norms and could be driven by both their physical and social environment. In the  
19 context of the COVID-19 pandemic, these environments correspond to epidemiological risk  
20 from contacts and the social construction of risk by communication within networks of  
21 friends. Understanding when, and under which circumstances, each modality of influence can  
22 foster the widespread adoption of protective behaviours is critical for shaping useful,  
23 practical public health messaging that will best enhance the public response.

24 Methods: We use a multiplex network approach to explore how information from both  
25 physical contact and social communication networks is driving a mitigating behavioural  
26 response to disease risk.

27 Findings: We show that maintaining focus on awareness of risk in each individual's physical  
28 layer contacts promotes the greatest reduction in disease spread, but only when an individual  
29 is aware of the symptoms of a non-trivial proportion of their physical contacts (approximately  
30 20% or more). Information from the communication layer was less useful when these  
31 connections matched less well with physical contacts and contributed little in combination  
32 with accurate information from the physical layer.

33 Interpretation: We conclude that maintaining social focus on local outbreak status will allow  
34 individuals to structure their perceived social norms appropriately and respond more rapidly  
35 when risk increases. Finding ways to relay accurate local information from trusted  
36 community leaders could improve mitigation even where more intrusive/costly strategies,  
37 such as contact-tracing, are not possible.

## 40 **Introduction**

41 Our current best public health recommendations for mitigation of the COVID-19 pandemic  
42 rely on using behavioural interventions such as social distancing and mask wearing, and  
43 behaviourally driven acceptance of vaccines (where available) to curtail transmission of  
44 infection. The success of these policies requires widespread adherence to achieve epidemic  
45 control; as with herd immunity, threshold effects in efficacy mean that gaps in adoption can  
46 quickly compromise any benefits<sup>[1, 2]</sup>. Therefore, identifying how the adoption of these  
47 behaviours is shaped over the course of an epidemic is a key challenge in designing effective  
48 mitigation strategies<sup>[3-6]</sup>.

49 Adherence, however, relies on individual behavioural choices and so can be complicated to  
50 understand and predict<sup>[3, 7]</sup>. Well-established theory from psychology acknowledges that the  
51 factors influencing whether or not people take action are complicated<sup>[8, 9]</sup>. One of the  
52 dominant theories (the theory of planned behaviour<sup>[10]</sup>), posits that action is the composite  
53 result of the individual's attitudes and beliefs, the individual's perception of social norms  
54 regarding that behaviour, and the individual's perception of their own behavioural control  
55 over their actions (alternative theories of behaviour, such as Value-Belief-Norm theory<sup>[11]</sup>  
56 also posit similar influences, though in different relation to each other). In the case of  
57 COVID-19, adoption of and adherence to behavioural interventions are therefore likely to be  
58 predicated on perception of two main features: a) individual attitudes and beliefs about  
59 personal risk of infection and its consequences<sup>[12]</sup>, and b) the social norms around adherence  
60 in the individual's community<sup>[13]</sup>.

61 An individual's perception of these features is shaped by communication within their network  
62 of friends, neighbours, and community leaders<sup>[14, 15]</sup>. Most likely, the network of a person's  
63 close physical contacts, through which they risk infection, differs from their regular  
64 communication network (in person and online) of people who contribute to their attitudes and  
65 beliefs surrounding preventative behaviours, and from whom they are likely to estimate the  
66 social norms of their community. These distinct networks underlie a disconnect between  
67 someone's perception of their risk versus their actual risk. On one hand, an individual's  
68 communication network could provide early warning of encroaching exposure risks derived  
69 from the spread of awareness ahead of the infection itself<sup>[16, 17]</sup>. On the other hand, the  
70 mismatch between the communication layer and infection layer may mean that an individual  
71 could underestimate their risk (e.g., communication networks are likely to be more sparsely  
72 connected than networks of infection-relevant contacts in populations that are not socially

73 distancing). Despite this, we still understand relatively little about the potential implications  
74 of acquiring information from these two different sets of contacts.

75 The dynamics triggered by the spread of awareness through the population are further  
76 complicated by the timescales of observable risk due to the etiology of COVID-19. The  
77 latency in the development of symptoms and the capacity for presymptomatic, or even  
78 asymptomatic, transmission make estimation of real-time risk by surveillance complicated,  
79 even without considering different sources of information<sup>[18]</sup>. In terms of understanding  
80 disease prevalence, the relative reliance of individuals in shaping their beliefs, and thus their  
81 actions, on their own direct observation of health among their daily physical contact network  
82 may have an effect that is distinct from that of their (potentially more geographically distant)  
83 communication network. The balance of these distinct network effects may therefore be the  
84 critical feature in determining the success of behavioural public health measures to combat  
85 COVID-19.

86 We employ a multiplex network method to test the relative adoption of behavioural  
87 interventions in populations of individuals who rely on a) their communication network layer  
88 only (henceforth referred to as simply the “communication layer”), b) their physical contact  
89 network layer only (henceforth referred to as the “infection layer”), and c) both layers  
90 simultaneously to inform their understanding of COVID-19, and therefore their individual  
91 adherence to protective behaviours such as mask wearing or social distancing. We further  
92 consider the influence of structure in both layers of the network and how that structure might  
93 impact the behaviour of populations as they rely on perceptions constructed from contacts in  
94 those layers. Geographic and social heterogeneity in contact structure are modelled at low  
95 and high levels of modularity (i.e. differences in local versus global density of contacts; see  
96 Methods). In addition to homogeneous mixing, we consider homophily based upon  
97 predisposition, which are modelled as social norms that can be shared in the communication  
98 network. While not exhaustive, these studies offer insight into how communities can  
99 reinforce the types of informational access that foster protective behavioural decision making  
100 among their members.

101

## 102 **Methods**

### 103 **Overview**

104 We used stochastic models to test how the awareness of symptomatic neighbours in either a)  
105 the set of people that a person who communicates with on a regular basis (their

106 communication layer), b) the set of people that a person is in close proximity to (their  
107 infection layer), or c) both of these sets of contacts can impact epidemic spread of an  
108 infection with COVID-19 like dynamics. We simulated realistic, multiplex social networks  
109 for our populations that coupled a layer of infection-relevant contacts through which the  
110 epidemic was simulated and a communication layer through which concern about the disease  
111 could simultaneously spread. All modelling was conducted in R3.6.1<sup>[19]</sup> and the code used is  
112 provided on GitHub ([https://github.com/matthewsilk/CoupledDynamics2\\_layeruse](https://github.com/matthewsilk/CoupledDynamics2_layeruse)). The  
113 general modelling framework was the same as that used by Silk et al.<sup>[20]</sup> and is described in  
114 that paper and in the Supplementary Material.

115

### 116 **Population generation**

117 We generated populations of 2000 individuals (a balance between minimising stochasticity in  
118 early epidemic outcomes and computational efficiency), which consisted of children (24%),  
119 young adults (63%) and old adults (13%). Age classes could differ in the social connections,  
120 epidemiological outcomes and concern about the disease (as detailed below). Individuals also  
121 had one of two baseline predispositions and homophily by predisposition impacted patterns  
122 of social connections (in either or both layers of the multiplex network).

123

### 124 **Social network generation**

125 We used the same 9 multiplex social networks as detailed in Silk et al.<sup>[20]</sup>. These were  
126 coupled, multiplex networks that connected all individuals within a communication layer that  
127 influenced the spread of concern about the disease and an infection layer that influenced the  
128 transmission of the pathogen itself. A full description of the algorithm used to generate these  
129 networks is provided in the Supplementary Material. For this study, global edge densities  
130 were always higher in the infection layer than in the communication layer. The network  
131 contained either a) no homophily in either layer, b) homophily in the communication layer, or  
132 c) homophily in both layers. Community structure was introduced using a re-wiring  
133 algorithm (as detailed in the Supplementary Material): either the relative modularity of both  
134 layers was set to 0.4, both to 0.6, or the infection layer was set to 0.6 and the communication  
135 layer to 0.4. Each child was assigned two parents from the same predisposition and  
136 community. If children shared one parent they also shared the other but parents could be  
137 connected or unconnected. Each young adult formed connections with a number of old adults  
138 of the same predisposition (representing older relatives, friends or community members) as

139 detailed in the Supplementary Material. Children shared the same connections to old adults as  
140 their parents. When the multiplex network was constructed we re-assigned parents from the  
141 infection layer to match those in the communication layer. Child-old adult connections were  
142 re-assigned accordingly.

143

#### 144 **Concern model**

145 We used the same concern model as Silk et al.<sup>[20]</sup>. Concern about the disease was modelled as  
146 a complex contagion<sup>[21]</sup> through the communication layer. Whether an individual was  
147 adherent to mitigation measures or not (a binary trait) was based on a Bernoulli draw in  
148 which the probability of adherence depended on an underlying trait continuous we term  
149 concern. As a result, individuals could fluctuate between adherent or non-adherent states and  
150 this was more likely if they had intermediate values of concern. Concern could be influenced  
151 by a) Social Construction (becoming more concerned if neighbours in the communication  
152 layer were adherent), b) Reassurance (becoming less concerned if all neighbours in the  
153 communication layer were perceived to be healthy (i.e. symptom free) and c) Awareness  
154 (becoming more concerned if network neighbours were symptomatic). For this study the  
155 information gained for Awareness could be gained from either the communication layer, the  
156 infection layer or both layers. Because an individual is unlikely to find out about the status of  
157 every individual in their infection layer, we conducted additional simulations in which there  
158 was imperfect detection of symptomatic contacts in the infection layer (probability of  
159 detection: 0.5, 0.2 and 0.05). The concern of children was not modelled. They were assigned  
160 as adherent if either or both of their parents were concerned.

161 Each time an individual became adherent they cut connections to a negligible edge weight  
162 (see Supplementary Material) within the infection layer while maintaining their connectivity  
163 in the communication layer. If an individual became non-adherent then these edge weights  
164 returned to their full weight.

165

#### 166 **Infectious disease model**

167 Our infectious disease model is the same stochastic network model described in Silk et al.<sup>[20]</sup>  
168 with parameter values adapted from<sup>[22, 23]</sup>. The model contains susceptible (S), exposed (E),  
169 pre-symptomatic (I1), symptomatic (I2), hospitalised (I3), recovered (R) and dead (D)  
170 compartments. Parameter values are provided in Table S1 and details of the algorithm used  
171 are provided in the Supplementary Material.

172

## 173 **Simulations**

174 For this paper we conducted simulations for the nine multiplex networks described (with  
175 different combinations of homophily by predisposition and modularity), for 50 values of the  
176 Social Construction and Reassurance effects (paired draws from independent uniform  
177 distributions) and 10 values of the Awareness effect. We then conducted simulations in which  
178 the Awareness effect (observational learning of symptomatic infection) applied to a) contacts  
179 in the communication layers, b) contacts in the infection layer and c) contacts from both  
180 layers combined. For scenario b) we repeated the full set of simulations with 0·5, 0·2 and  
181 0·05 probability of symptomatic contacts being detected at each day. This resulted in a total  
182 of 27,000 independent simulation runs. For each simulation run we simulated a time period of  
183 300 days. The simulation algorithm was the same used in Silk et al.<sup>[20]</sup> and is detailed in the  
184 Supplementary Material.

185

## 186 **Analysis**

187 To compare between different runs of the simulations we quantified the height of the  
188 epidemic peak at a population level by aggregating the daily counts of symptomatic  
189 infections in all 10 communities. This measure of the height of the epidemic peak indicated  
190 how successfully each simulated population managed to “flatten the curve” with their  
191 adherence to mitigating behaviours<sup>[4]</sup>. We compare epidemic peaks from when individuals  
192 learned about symptomatic network neighbours from different types of social contact while  
193 considering values of the Social Construction and Reassurance effects. To help explain some  
194 of the differences between the infection and communication layers in their ability to “flatten  
195 the curve” we also examined the similarity of connections in these layers by quantifying the  
196 proportion of contacts in each layer that were also present in the other for each multiplex  
197 network.

198

## 199 **Role of the funding source**

200 The funding source had no role whatsoever in the design, analysis, interpretation, or  
201 presentation of this work.

202

## 203 **Results**

204 When we assume individual can identify 100% of symptomatic contacts the Awareness  
205 Effect is more effective in flattening the curve when people respond to illness in their  
206 infection layer rather than in their communication layer (panels a versus b in Figs. 1 and 2).  
207 When this is the case, even relatively weak Awareness Effects can contribute to flattening the  
208 curve. Using information from the infection layer is nearly as effective as using information  
209 from both the infection and communication layers except when the Awareness Effect is very  
210 weak (compare panels b and c in Figs 1 and 2). When social construction is weak there is an  
211 important difference regardless of the strength of the Reassurance effect (Fig. 1), while when  
212 social construction is strong it plays an important role in flattening the curve except in the  
213 case when the Reassurance Effect is strong, meaning that differences caused by the source of  
214 information for the Awareness Effect are only noticeable when this is the case (Fig. 2).  
215 Consequently, we focus on the case when Social Construction is weak for subsequent results.  
216 A second notable difference that arises when people respond to prevalence in their infection  
217 layer rather than the communication layer is that the strength of the Reassurance Effect  
218 becomes less important. When individuals respond to illness in their communication layer,  
219 the epidemics always have higher peaks with a strong Reassurance effect (also reliant on the  
220 communication layer) even when the Awareness effect is strong and the curve has been  
221 flattened (Fig. 1a). However, when the Awareness Effect is stronger ( $>0.6$ ), learning about  
222 illness from the infection layer or both layers results in similar epidemic peaks regardless of  
223 the strength of the Reassurance Effect (Figs. 1b and 1c).  
224



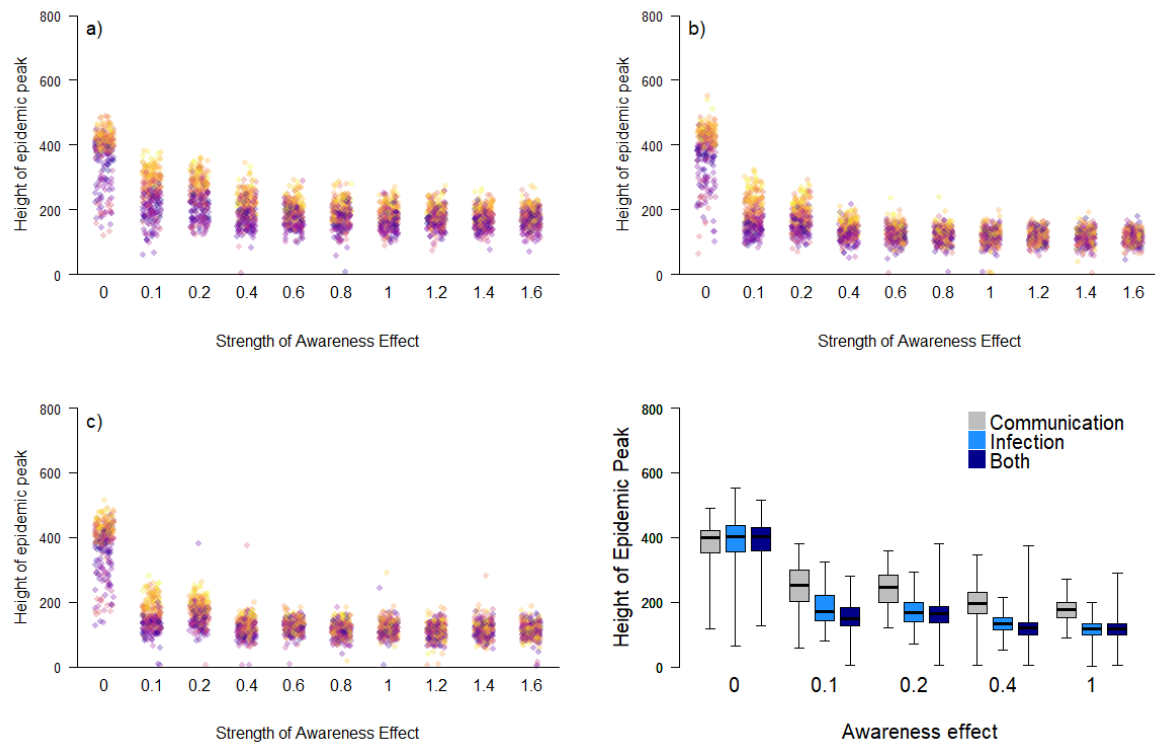

225

226 **Figure 1. The relationship between the height of the epidemic peak and strength of the Awareness**

227 **effect when Social Construction is weak ( $<0.3$ ). An individual learns of symptomatic contacts from**

228 **a) their communication layer, b) their infection layer (learning from 100% of contacts) and c) both**

229 **layers together. The colour of points in panels (a-c) indicates the strength of the Reassurance effect:**

230 **yellow indicating a strong reassurance effect through to purple indicating a weak Reassurance effect.**

231 **In panel (d) we contrast the height of the epidemic peak directly for selected values of the Awareness**

232 **effect. Boxes indicate the interquartile range, the bold horizontal line the median and the whiskers**

233 **extend to the full range of the data.**

234



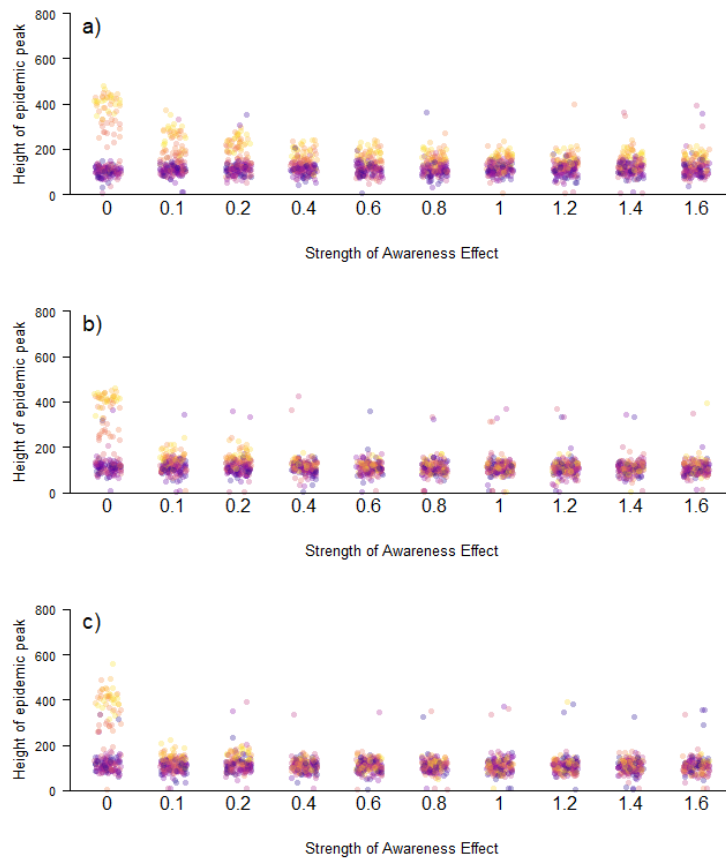

235

236 **Figure 2. The relationship between the height of the epidemic peak and strength of the Awareness**

237 **effect when Social Construction is strong ( $>0.3$ ). An individual learns of symptomatic contacts from**

238 **a) their communication layer, b) their infection layer (learning from 100% of contacts) and c) both**

239 **layers together. The colour of points indicates the strength of the Reassurance effect: yellow**

240 **indicating a strong reassurance effect through to purple indicating a weak Reassurance effect.**

241

242 When we assume that individual can partially identify the symptomatic contacts in their  
243 infection layer, the mitigating effect is reduced considerably in our networks (Fig. 3). When  
244 there is a 50% chance of an individual detecting an ill neighbour in their infection layer, the  
245 height of the epidemic peak remains lower than when an individual gains information on the  
246 prevalence of infection from their communication layer with the difference increasing as the  
247 strength of the Awareness Effect gets stronger. When there is a 20% chance of detection in  
248 the infection layer, the epidemic peak is marginally higher than when (accurate) information  
249 is used from the communication layer with a weak Awareness Effect and slightly lower with  
250 a strong Awareness Effect. When there is a 5% chance of detection the mitigating influence  
251 of the Awareness Effect is very limited indeed and restricted to strong Awareness Effects.  
252 The structure of the network was relatively unimportant in determining the success with  
253 which populations were able to “flatten the curve” (Fig. 4, Fig. S1). Most strikingly, there  
254 was a small negative impact on the value of information from the communication layer when  
255 there was homophily only in that layer and not in the infection layer (networks 7-9). When  
256 this was the case epidemic peaks remained higher when individuals acquired information on  
257 local prevalence from their communication layer. This pattern was driven by their being a  
258 greater mismatch between the two layers when there was only homophily in the  
259 communication layer; a lower proportion of edges in the infection layer were also present in  
260 the communication layer (Fig. 5). It is harder, therefore, to flatten the curve when key aspects  
261 of structure of communication and infection layers are mismatched and individuals gain  
262 information on illness from their communication layer. Otherwise there were no clear and  
263 consistent patterns related to network structure over the range of structures tested here.  
264 Results were qualitatively similar regardless of the strength of the Awareness Effect (Fig.  
265 S1).

266

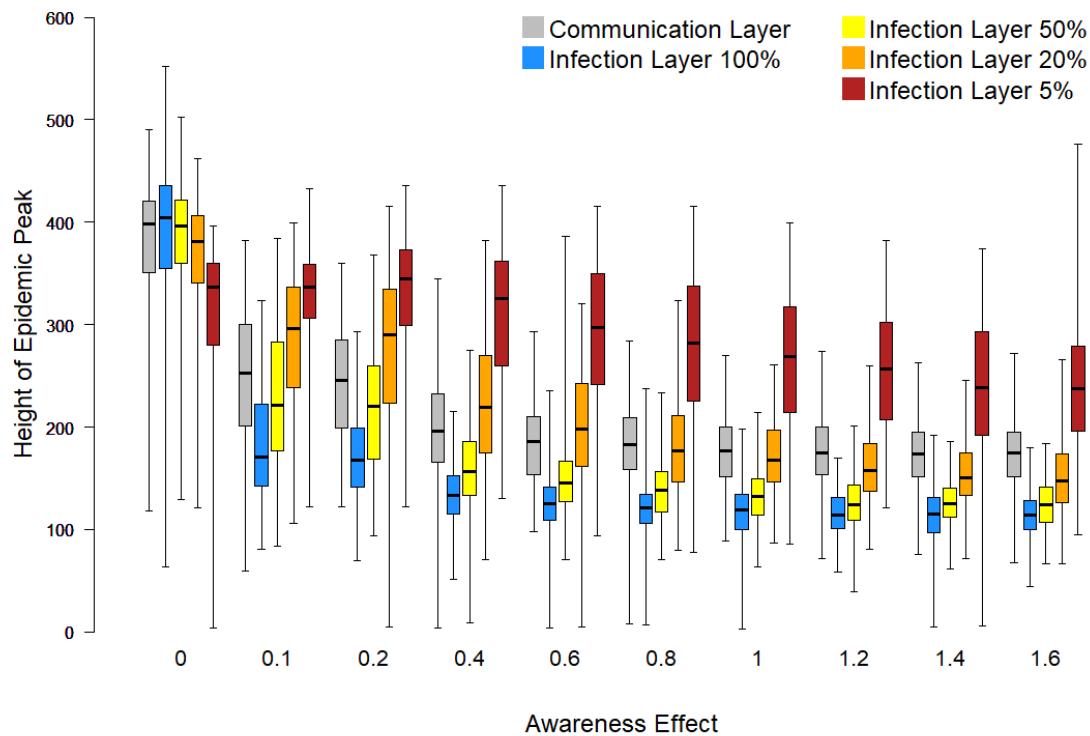

267

268 **Figure 3. The relationship between the height of the epidemic peak and strength of the Awareness**  
269 **effect when Social Construction is weak ( $<0.3$ ). We show the relationship when Awareness is**  
270 **acquired through the communication layer (grey) and the infection layer when 100% (blue), 50%**  
271 **(yellow), 20% (orange) and 5% (red) of symptomatic contacts are detected each day. Boxes indicate**  
272 **the interquartile range, the bold horizontal line the median and the whiskers extend to the full range**  
273 **of the data.**

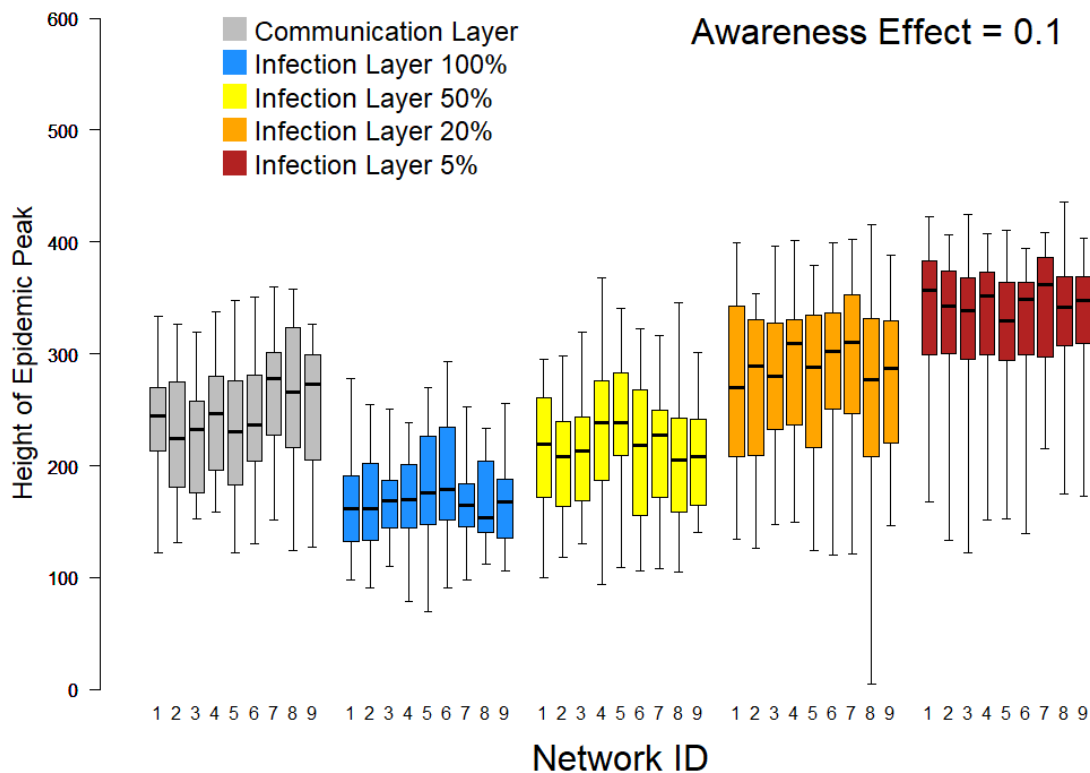

274

275 **Figure 4. The relationship between the height of the epidemic peak and how an individual finds out**  
 276 **about symptomatic contacts when the Social construction effect is weak ( $<0.3$ ) for an Awareness**  
 277 **effect of  $0.1$  plotted separately for each of the nine multiplex networks used in the study. Networks**  
 278 **1-3 have no homophily in either layer, networks 4-6 have homophily in both layers and networks 7-9**  
 279 **have homophily in the communication layer only. In networks 1, 4 and 7 both layers have a relative**  
 280 **modularity of  $0.4$ , in networks 2, 5 and 8 both layers have a relative modularity of  $0.6$ , and in**  
 281 **networks 3, 6 and 9 the relative modularity of the infection layer is  $0.6$  and the relative modularity of**  
 282 **the communication layer is  $0.4$ . Plots for other Awareness effects are qualitatively similar (see Fig.**  
 283 **SI).**

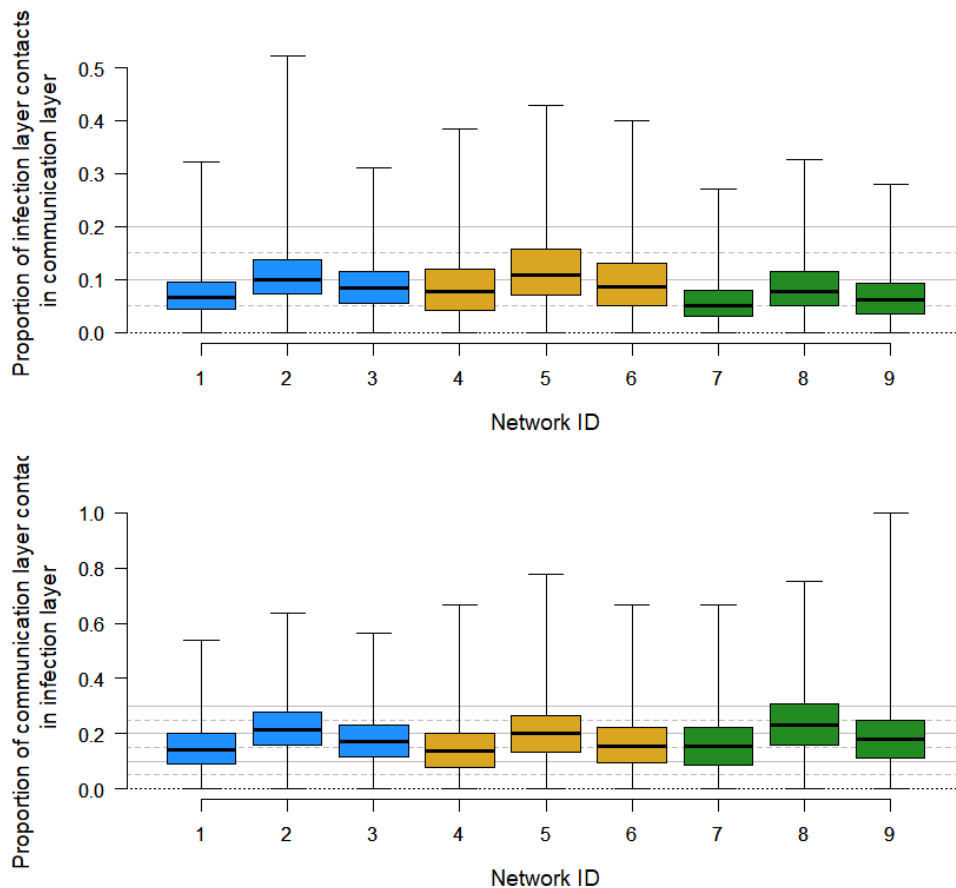

284

285 **Figure 5. The proportion of contacts in each layer of the multiplex network that are present in the**  
286 **other layer.** Panel (a) shows the proportion of infection layer contacts also present in the  
287 communication layer and panel (b) show the proportion of communication layer contacts also present  
288 in the infection layer. Networks 1-3 have no homophily in either layer, networks 4-6 have homophily  
289 in both layers and networks 7-9 have homophily in the communication layer only. In networks 1, 4  
290 and 7 both layers have a relative modularity of 0.4, in networks 2, 5 and 8 both layers have a relative  
291 modularity of 0.6, and in networks 3, 6 and 9 the relative modularity of the infection layer is 0.6 and  
292 the relative modularity of the communication layer is 0.4.

293

294

## 295 **Discussion**

296 Despite the natural inclination to believe that the influence of community leaders and trusted  
297 social contacts can help us each to make better decisions, in this case, the results of our study  
298 demonstrate that the impact of that trusted community may instead compromise our ability to  
299 respond to the actual risks around us (see Figs. 1,2, and 3) if the alternative is accurate  
300 information on prevalence in an individual's likely physical contacts. However, the  
301 advantage brought about by an individual's knowledge of the prevalence in their "infection  
302 layer" declines very rapidly as the accuracy of this information deteriorates. This has strong,  
303 direct implications for individuals living in circumstances in which their physical contacts are  
304 likely removed from their social spheres of influence. Critically, this pattern reflects large  
305 urban centres in which individuals may physically contact many people using public  
306 transportation, or riding elevators and moving among offices or apartments in large in high-  
307 rise buildings, but are likely instead to rely on a mostly separate community of family, faith,  
308 or recreational activities for social community and conversation from which they will form  
309 their perceptions of risks and norms.

310 Of course, this result relies on the low overlap between contacts present in both the  
311 communication and disease layers that shape an individual's perceptions and risks (see Fig.  
312 5). If those layers were instead identical (as in small, remote rural communities or highly  
313 segregated, small, well-mixed communities as exist affiliated with some religious groups),  
314 then the communication layer and infection layer will be equivalent in the information they  
315 provide, meaning that more information is available on local prevalence in an individual's  
316 infection layer and so improving the decision-making of individuals based on observations  
317 of their personal networks.

318 Our results show that the availability of accurate information from an individual's infection  
319 layer is much more effective in mitigating disease spread (i.e. "flattening the curve") than  
320 using only their communication layer, and that when this is the case using information from  
321 both only performs marginally better than using the infection layer alone. However, as the  
322 availability of accurate information from the infection layer declines the success of mitigation  
323 declines very rapidly. In our networks, a >20% chance of detecting each symptomatic  
324 neighbour in the infection layer is required for mitigation to be more successful than when  
325 individuals use their communication layer alone.

326 The former result suggests that populations comprised of individuals who tend more towards  
327 independent risk assessment than on reliance on community leadership may respond better to

328 public health interventions. However, the latter result indicates the importance of highly  
329 accurate information from the infection layer at a community level. Therefore any social  
330 norms that reduce observability of infection in a local community can undercut the efficacy  
331 of recommended behavioural interventions. This is especially important in shaping public  
332 messaging since both within group density (i.e. modularity) and closeness of beliefs within a  
333 community (i.e. homophily) have less of an impact than the information on which the  
334 members of that community rely (see Fig. 4). We therefore strongly support the adoption of  
335 public reports of identified cases in local communities that come into regular potential  
336 contact with each other. While, of course, this requires sensitivity to personal privacy, regular  
337 announcements/reminders at a city, company, school, or neighbourhood level of active  
338 disease prevalence can potentially provide critical and effective reinforcement for the  
339 individual adoption of behaviours that can protect everyone.

340 Awareness itself is not without complexity. The centralized collection and analysis of data at  
341 regional or national scales involves logistical challenges and can cause delay in reporting that  
342 information back to the public<sup>[24]</sup>. It is also frequently the case that communities pay more  
343 attention to, and place greater trust in, local sources of information than in more remote  
344 sources<sup>[25]</sup>. Policies that focus on community leadership to ensure a local focus for awareness  
345 helps to address both of these difficulties.

346 Perhaps most importantly, this study suggests the need for leaders of social groups to ensure  
347 attention is paid to cases of COVID-19 in their community. Luckily, this is in keeping with  
348 the mission of many social groups focused on community support. Communities of worship,  
349 social action organizations, and community volunteer groups have all been active participants  
350 across the globe in making sure that individuals who are unwell but not so severely impacted  
351 as to be hospitalized have access to groceries, medicines, and wellness checks. By actively  
352 highlighting the need for these services within their own community, these actions  
353 themselves support broader adoption of preventative behaviours and thereby not only help  
354 individuals already affected by COVID-19, but actively decrease the likely magnitude of  
355 local impacts from the pandemic.

356

## 357 **Conclusion**

358 One of the most fundamental challenges in creating effective public health policies is the  
359 design of recommendations that will not only achieve theoretical outcomes but will be  
360 adopted by enough of a willing public to accomplish those outcomes in the real world.



361 Integrating an understanding of how individual perceptions shape behaviours, and how social  
362 context itself shapes perceptions has become one of the critical stumbling points in our local,  
363 national, and global response to the COVID-19 pandemic. Our results clearly show that local,  
364 accurate, rapid, and trusted information can enable better emergent behaviours. Thankfully,  
365 these paths are within the capability of our public health community and local community  
366 leadership to provide.

367

### 368 **Data Sharing Statement**

369 No primary data was collected as part of this effort. All relevant code is publicly available at  
370 ([https://github.com/matthewsilk/CoupledDynamics2\\_layeruse](https://github.com/matthewsilk/CoupledDynamics2_layeruse)).

371

### 372 **Supplementary Methods**

#### 373 **Overview**

374 We used stochastic models to test how the awareness of symptomatic neighbours in either a) the set of  
375 people that a person who communicates with on a regular basis (their communication layer), b) the set  
376 of people that a person is in close proximity to (their infection layer), or c) both of these sets of  
377 contacts can impact epidemic spread of an infection with COVID-19 like dynamics. We simulated  
378 realistic, multiplex social networks for our populations that coupled a layer of infection-relevant  
379 contacts through which the epidemic was simulated and a communication layer through which  
380 concern about the disease could simultaneously spread. All modelling was conducted in R3.6.1<sup>[19]</sup> and  
381 the code used is provided on GitHub ([https://github.com/matthewsilk/CoupledDynamics2\\_layeruse](https://github.com/matthewsilk/CoupledDynamics2_layeruse)).  
382 The general modelling framework was the same as that used by Silk et al.<sup>[20]</sup>.

383

#### 384 **Population generation**

385 We generated populations of 2000 individuals (a balance between minimising stochasticity in early  
386 epidemic outcomes and computational efficiency), which consisted of children (24%), young adults  
387 (63%) and old adults (13%). These proportions were set to match recent US demographic data. Age  
388 classes could differ in the social connections, epidemiological outcomes and concern about the  
389 disease (as detailed below). Individuals also had one of two baseline predispositions, with 50% of  
390 each predisposition. Homophily by predisposition impacted only patterns of social connections (in  
391 either or both layers of the multiplex network).

392

#### 393 **Social network generation**

394 We generated 9 multiplex social networks as detailed in Silk et al.<sup>[20]</sup>. These were coupled, multiplex  
395 networks that connected all individuals within a communication layer that influenced the spread of

396 concern about the disease and an infection layer that influenced the transmission of the pathogen  
397 itself. Briefly, networks were generated as follows:

398 1. For each layer, within age class and within predisposition connections were simulated as  
399 Erdős-Renyi random graphs using `igraph`<sup>[26]</sup>. We specified age-specific edge densities for within  
400 predisposition connections. For this study, global edge densities were always higher in the infection  
401 layer than in the communication layer.

402 2. Between predisposition connections were then added to form three overall networks for each  
403 age class in each layer. We specified age-specific between-predisposition edge densities (which could  
404 differ from within-predisposition densities). The level of homophily according to predisposition is  
405 defined by the difference between within- and between-predisposition edge densities. We included  
406 three types of homophily in the multiplex network: a) no homophily in either layer, b) homophily in  
407 the communication layer, or c) homophily in both layers.

408 3. We then introduced community structure into each network layer. A rewiring algorithm was  
409 used to impose community structure within the three age-class networks as per Silk et al.<sup>[20]</sup>. We  
410 implemented a block model with 10 communities and re-assigned edges to achieve a target  
411 modularity while maintaining the initial edge density and level of homophily. We used 0.4 and 0.6 as  
412 target relative modularity<sup>[27]</sup> for our community structure. The proportion of each predisposition  
413 within each community was the same as the overall population. In this study either both layers had a  
414 modularity of 0.4, both had a modularity of 0.6, or the infection layer had a modularity of 0.6 and the  
415 communication layer a modularity of 0.4 (as per Silk et al.<sup>[20]</sup>).

416 4. Each child was assigned two parents from the same predisposition and community. If children  
417 shared one parent they also shared the other but parents could be connected or unconnected.

418 5. Each young adult formed connections with a number of old adults of the same predisposition  
419 (representing older relatives, friends or community members). The number of connections for each  
420 young adult was a drawn from a Poisson distribution ( $\lambda=3$ ). Connections could occur within or  
421 between communities with the probability of within-community connections being the same as the  
422 modularity of the network. Children shared the same connections to old adults as their parents.

423 We used 8 different simulated networks in total for this study (four for the communication layer and  
424 four for the infection layer), which when combined generated nine different multiplex networks that  
425 were a full combination of the three homophily conditions and three modularity conditions defined  
426 above. When the multiplex network was constructed we re-assigned parents from the infection layer  
427 to match those in the communication layer. Child-old adult connections were re-assigned accordingly.

428

### 429 **Concern model**

430 We used the same concern model as Silk et al.<sup>[20]</sup>. Concern about the disease was modelled as a  
431 complex contagion<sup>[21]</sup> through the communication layer. Whether an individual was adherent to

432 mitigation measures or not (a binary trait) was based on a Bernoulli draw in which the probability of  
433 adherence depended on an underlying trait continuous we term concern. As a result, individuals could  
434 fluctuate between adherent or non-adherent states and this was more likely if they had intermediate  
435 values of concern. Concern could be influenced by the following factors with changes modelled on a  
436 logit scale.

- 437 1. For this study all adults started with the same concern. The initial level of concern was  
438 defined with an expectation of 20% of adults being adherent to mitigation measures at the start of  
439 each simulation run.
- 440 2. Social Construction of concern – concern could change based on the proportion of immediate  
441 neighbours in the communication layer of the network that were adherent in the previous day. We  
442 modelled this change as a linear increase in belief as the proportion of adherent connections increased.  
443 We allowed the strength of this relationship to vary, drawing 50 different values from a uniform  
444 distribution between 0 and 0.5 for the effect size per day. This range of parameter values were  
445 selected based on prior use of the model (Silk et al.<sup>[20]</sup>).
- 446 4. Reassurance effect from communication neighbours – concern could be reduced at each day  
447 that all of an individual’s connections in the communication layer were symptom free (whether  
448 susceptible, exposed, pre-symptomatic or recovered). We drew 50 values from a uniform distribution  
449 between -0.1 and 0 (which we paired with equivalent values of the Social Construction effect).
- 450 5. Awareness effect based on prevalence of symptomatic contacts – concern could increase  
451 based on the number of an individual’s connections that were symptomatic. We assigned 10 values (0,  
452 0.1, 0.2, 0.4, 0.6, 0.8, 1, 1.2, 1.4 and 1.6) for this per day increase in concern per symptomatic  
453 neighbour. For this paper the awareness effect could depend on a) an individual’s contacts in the  
454 communication layer, b) an individual’s contacts in the infection layer or c) an individual’s contacts in  
455 both layers combined. Because an individual is unlikely to find out about the status of every  
456 individual in their infection layer, we conducted additional sets of simulations in which there was  
457 imperfect detection of symptomatic contacts in the infection layer. We used detection probabilities of  
458 50%, 20% and 5%.
- 459 6. The concern of children was not modelled. They were assigned as adherent if either or both of  
460 their parents were adherent.  
461 Each time an individual became adherent they cut connections within the infection layer while  
462 maintaining their connectivity in the communication layer. Individuals cut connections with a  
463 probability of 0.5, with edges cut to have edge weights of 0.001 (i.e. not removed but sufficiently low  
464 to result in a negligible probability of transmission). If an individual became non-adherent then these  
465 edge weights returned to their full weight.

466

467 **Infectious disease model**

468 Our infectious disease model is the same stochastic network model described in Silk et al.<sup>[20]</sup> with  
469 parameter values adapted from Weitz et al.<sup>[22]</sup> and Lofgren et al.<sup>[23]</sup>. The model contains susceptible  
470 (S), exposed (E), pre-symptomatic (I1), symptomatic (I2), hospitalised (I3), recovered (R) and dead  
471 (D) compartments. The transition between compartments is detailed below and parameter values are  
472 provided in Table S1 (reproduced from Silk et al.<sup>[20]</sup>). The infection model proceeded as follows  
473 (reproduced from Silk et al.<sup>[20]</sup>):

- 474 1. The transition from susceptible to exposed depended on the number of contacts each  
475 susceptible individual had with infected individuals (I1, I2, I3). Each contact was associated with a  
476 pre-defined probability of transmission. We selected a value for the transmission probability that  
477 resulted in unmitigated epidemics infecting approximately 80% of the population as per Ferguson et  
478 al.<sup>[28]</sup>.
- 479 2. The length, in days, of the incubation period (exposed; E) and of each infectious period (I1-3)  
480 were set using draws from Poisson distribution (Table S1).
- 481 3. Individuals could transition from symptomatic (and at home) to hospitalised, and from  
482 hospitalised to dead with pre-defined daily probabilities which differed for young (low risk) adults  
483 and old (high risk) adults. These daily probabilities were calculated based on Weitz et al.<sup>[22]</sup> and  
484 Lofgren et al.<sup>[23]</sup> and then adapted to produce a realistic proportion of cases being hospitalised during  
485 trial runs of the simulations (c.f. Reno et al.<sup>[29]</sup>). Children could be symptomatic (I2) but were never  
486 hospitalised reflecting the very low probability of this occurring in reality<sup>[30]</sup>. All individuals that  
487 reached the end of each infectious period without further progression of the disease were deemed to  
488 have recovered.
- 489 4. Symptomatic (I2) and hospitalised (I3) individuals cut all connections in the infection layer of  
490 the network to 0.001. These connections were restored to their full value if and when individuals  
491 recovered.

492

### 493 **Simulations**

494 For this paper we conducted simulations for the nine multiplex networks described (with different  
495 combinations of homophily by predisposition and modularity), for 50 values of the Social  
496 Construction and Reassurance effects (paired draws from independent uniform distributions) and 10  
497 values of the Awareness effect. We then conducted simulations in which the Awareness effect  
498 (observational learning of symptomatic infection) applied to a) contacts in the communication layers,  
499 b) contacts in the infection layer and c) contacts from both layers combined. For scenario b) we  
500 repeated the full set of simulations with 0.5, 0.2 and 0.05 probability of symptomatic contacts being  
501 detected at each day. This resulted in a total of 27,000 independent simulation runs. For each  
502 simulation run we simulated a time period of 300 days.

503 The simulations proceeded as follows (reproduced from Silk et al.<sup>[20]</sup>):

- 504 1. Ten random individuals were seeded with infection (in the exposed [E] class of the  
505 compartmental model).
- 506 2. Individuals were allocated initial values of belief based on pre-defined starting values and  
507 these were used to calculate which individuals were adherent on the first day.
- 508 3. The algorithm repeated a sequence events on each day, namely:
- 509 a) The infection layer of the network was rewired so that adherent individuals cut a 50% of their  
510 connections to have negligible edge weight.
- 511 b) The infection layer of the network was rewired so that newly symptomatic individuals cut  
512 their connections to have negligible edge weight.
- 513 c) The infection layer of the network was rewired so that newly recovered individuals restored  
514 their full connections (edge weights increased to 1)
- 515 d) We recorded the identity of all individuals that were currently symptomatic or hospitalised.
- 516 e) We ran the concern model to update the concern and adherence of individuals.
- 517 f) We ran the infectious disease model to update the infection status of all individuals
- 518 4. The algorithm moves on to the next day until the end of the defined time period (300 days).  
519 From each run of the simulations we recorded the total number of individuals who were infected on  
520 each day in each social community. We also recorded the proportion of each social community that  
521 was concerned or adherent to social distancing on each day.

522

### 523 **Analysis**

524 To compare between different runs of the simulations we quantified the height of the epidemic peak at  
525 a population level by aggregating the daily counts of symptomatic infections in all 10 communities  
526 and calculating the maximum prevalence of infected individuals (I1) in the population. This measure  
527 of the height of the epidemic peak indicated how successfully each simulated population managed to  
528 “flatten the curve” with their adherence to mitigating behaviours<sup>[4]</sup>. We present these results by  
529 comparing epidemic peaks when individuals learned about symptomatic network neighbours from  
530 different types of social contact while considering different values of the Social Construction and  
531 Reassurance effects.

532 To help explain some of the differences between the infection and communication layers in their  
533 ability to “flatten the curve” when used to provide information on local prevalence (to the Awareness  
534 effect), we also examined the similarity of connections in these layers by quantifying the proportion  
535 of contacts in each layer that were also present in the other (Fig. S1) for each of the nine multiplex  
536 networks that differed in homophily and modularity.

537

538

## 539 Supplementary Tables and Figures

540

541 Table S1. Parameter values for the SEIRD model used

| Parameter                                                                                 | Value used      |
|-------------------------------------------------------------------------------------------|-----------------|
| Transmission probability per contact                                                      | 0.3/mean degree |
| Mean length of incubation period                                                          | 5.1 days        |
| Mean length of pre-symptomatic period                                                     | 6.7 days        |
| Mean length of symptomatic period                                                         | 10 days         |
| Mean length of hospitalisation                                                            | 4.2 days        |
| Daily probability of symptomatic case becoming hospitalised for young adults and children | 0.0125          |
| Daily probability of symptomatic case becoming hospitalised for old adults                | 0.025           |
| Daily probability of death in hospitalised cases for young adults                         | 0.012           |
| Daily probability of death in hospitalised cases for young old adults                     | 0.092           |

542

543

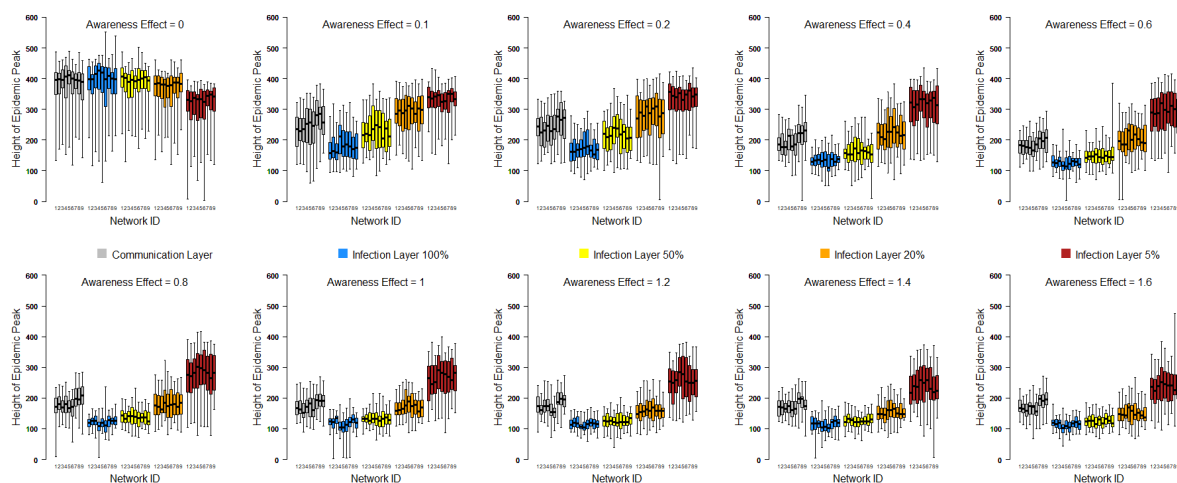

544

545 **Figure S1. The relationship between the height of the epidemic peak and how an individual finds**  
 546 **out about symptomatic contacts when the Social construction effect is weak (<0.3) for the full**  
 547 **range of Awareness effects modelled and plotted separately for each of the nine multiplex networks**  
 548 **used in the study. Networks 1-3 have no homophily in either layer, networks 4-6 have homophily in**  
 549 **both layers and networks 7-9 have homophily in the communication layer only. In networks 1, 4 and 7**  
 550 **both layers have a relative modularity of 0.4, in networks 2, 5 and 8 both layers have a relative**  
 551 **modularity of 0.6, and in networks 3, 6 and 9 the relative modularity of the infection layer is 0.6 and**  
 552 **the relative modularity of the communication layer is 0.4.**



## 553 References

- 554 1. Ngonghala, C.N., E. Iboi, S. Eikenberry, M. Scotch, C.R. MacIntyre, M.H. Bonds, and A.B.  
555 Gumel, *Mathematical assessment of the impact of non-pharmaceutical interventions on*  
556 *curtailing the 2019 novel Coronavirus*. Mathematical biosciences, 2020. **325**: p. 108364.
- 557 2. Imai, N., K.A. Gaythorpe, S. Abbott, S. Bhatia, S. van Elsland, K. Prem, Y. Liu, and N.M.  
558 Ferguson, *Adoption and impact of non-pharmaceutical interventions for COVID-19*.  
559 Wellcome Open Research, 2020. **5**.
- 560 3. Funk, S., E. Gilad, C. Watkins, and V.A. Jansen, *The spread of awareness and its impact on*  
561 *epidemic outbreaks*. Proceedings of the National Academy of Sciences, 2009. **106**(16): p.  
562 6872-6877.
- 563 4. Block, P., M. Hoffman, I.J. Raabe, J.B. Dowd, C. Rahal, R. Kashyap, and M.C. Mills, *Social*  
564 *network-based distancing strategies to flatten the COVID-19 curve in a post-lockdown world*.  
565 Nature Human Behaviour, 2020. **4**(6): p. 588-596.
- 566 5. Courtemanche, C., J. Garuccio, A. Le, J. Pinkston, and A. Yelowitz, *Strong Social Distancing*  
567 *Measures In The United States Reduced The COVID-19 Growth Rate: Study evaluates the*  
568 *impact of social distancing measures on the growth rate of confirmed COVID-19 cases across*  
569 *the United States*. Health Affairs, 2020: p. 10.1377/hlthaff.2020.00608.
- 570 6. Reluga, T.C., *Game theory of social distancing in response to an epidemic*. 2010.
- 571 7. Funk, S., M. Salathé, and V.A. Jansen, *Modelling the influence of human behaviour on the*  
572 *spread of infectious diseases: a review*. Journal of The Royal Society Interface, 2010. **7**(50):  
573 p. 1247-1256.
- 574 8. Schwarzer, R., *Modeling health behavior change: How to predict and modify the adoption*  
575 *and maintenance of health behaviors*. Applied psychology, 2008. **57**(1): p. 1-29.
- 576 9. Schwarzer, R. and R. Fuchs, *Changing risk behaviors and adopting health behaviors: The*  
577 *role of self-efficacy beliefs*. Self-efficacy in changing societies, 1995: p. 259-288.
- 578 10. Ajzen, I., *The theory of planned behavior*. Organizational behavior and human decision  
579 processes, 1991. **50**(2): p. 179-211.
- 580 11. Stern, P.C., T. Dietz, T. Abel, G.A. Guagnano, and L. Kalof, *A value-belief-norm theory of*  
581 *support for social movements: The case of environmentalism*. Human ecology review, 1999:  
582 p. 81-97.
- 583 12. Cori, L., F. Bianchi, E. Cadum, and C. Anthonj, *Risk perception and COVID-19*. 2020,  
584 Multidisciplinary Digital Publishing Institute.
- 585 13. Van Bavel, J.J., K. Baicker, P.S. Boggio, V. Capraro, A. Cichocka, M. Cikara, M.J. Crockett,  
586 A.J. Crum, K.M. Douglas, and J.N. Druckman, *Using social and behavioural science to*  
587 *support COVID-19 pandemic response*. Nature Human Behaviour, 2020: p. 1-12.
- 588 14. Seiler, M., A. Collins, and N. Fefferman, *Strategic Mortgage Default in the Context of a*  
589 *Social Network: An Epidemiological Approach*. Journal of Real Estate Research, 2013. **35**(4):  
590 p. 445-475.
- 591 15. Scherer, C.W. and H. Cho, *A social network contagion theory of risk perception*. Risk  
592 Analysis: An International Journal, 2003. **23**(2): p. 261-267.
- 593 16. Salehi, M., P. Siyari, M. Magnani, and D. Montesi, *Multidimensional epidemic thresholds in*  
594 *diffusion processes over interdependent networks*. Chaos, Solitons & Fractals, 2015. **72**: p.  
595 59-67.
- 596 17. Kitchovitch, S. and P. Lio, *Risk perception and disease spread on social networks*. Procedia  
597 Computer Science, 2010. **1**(1): p. 2345-2354.
- 598 18. Zhao, H., X. Lu, Y. Deng, Y. Tang, and J. Lu, *COVID-19: asymptomatic carrier transmission*  
599 *is an underestimated problem*. Epidemiology & Infection, 2020. **148**.
- 600 19. R Core Team, *R: A language and environment for statistical computing*. 2013, R Foundation  
601 for Statistical Computing: Vienna, Austria.
- 602 20. Silk, M., S. Carrignon, R.A. Bentley, and N. Fefferman, *Improving pandemic mitigation*  
603 *policies across communities through coupled dynamics of risk perception and infection*.  
604 Submitted.



- 605 21. Firth, J.A., *Considering complexity: animal social networks and behavioural contagions.*  
606 Trends in Ecology & Evolution, 2020. **35**(2): p. 100-104.
- 607 22. Weitz, J.S., S.J. Beckett, A.R. Coenen, D. Demory, M. Dominguez-Mirazo, J. Dushoff, C.-Y.  
608 Leung, G. Li, A. Măgălie, and S.W. Park, *Modeling shield immunity to reduce COVID-19*  
609 *epidemic spread.* Nature medicine, 2020: p. 1-6.
- 610 23. Lofgren, E., K. Lum, A. Horowitz, B. Madubuowu, and N. Fefferman, *The Epidemiological*  
611 *Implications of Incarceration Dynamics in Jails for Community, Corrections Officer, and*  
612 *Incarcerated Population Risks from COVID-19.* medRxiv, 2020.
- 613 24. Jajosky, R.A. and S.L. Groseclose, *Evaluation of reporting timeliness of public health*  
614 *surveillance systems for infectious diseases.* BMC public health, 2004. **4**(1): p. 1-9.
- 615 25. Bond, K.C., S.B. Macfarlane, C. Burke, K. Ungchusak, and S. Wibulpolprasert, *The evolution*  
616 *and expansion of regional disease surveillance networks and their role in mitigating the*  
617 *threat of infectious disease outbreaks.* Emerging health threats journal, 2013. **6**(1): p. 19913.
- 618 26. Csardi, G. and T. Nepusz, *The igraph software package for complex network research.*  
619 InterJournal, complex systems, 2006. **1695**(5): p. 1-9.
- 620 27. Sah, P., S.T. Leu, P.C. Cross, P.J. Hudson, and S. Bansal, *Unraveling the disease*  
621 *consequences and mechanisms of modular structure in animal social networks.* Proceedings  
622 of the National Academy of Sciences, 2017. **114**(16): p. 4165-4170.
- 623 28. Ferguson, N.M., D. Laydon, G. Nedjati-Gilani, N. Imai, K. Ainslie, M. Baguelin, S. Bhatia,  
624 A. Boonyasiri, Z. Cucunubá, and G. Cuomo-Dannenburg, *Report 9: Impact of non-*  
625 *pharmaceutical interventions (NPIs) to reduce COVID-19 mortality and healthcare demand.*  
626 *Imperial College London; 16 March 2020.* DOI: <https://doi.org/10.25561/77482>, 2020.
- 627 29. Reno, C., J. Lenzi, A. Navarra, E. Barelli, D. Gori, A. Lanza, R. Valentini, B. Tang, and M.P.  
628 Fantini, *Forecasting COVID-19-Associated Hospitalizations under Different Levels of Social*  
629 *Distancing in Lombardy and Emilia-Romagna, Northern Italy: Results from an Extended*  
630 *SEIR Compartmental Model.* Journal of Clinical Medicine, 2020. **9**(5): p. 1492.
- 631 30. Yuki, K., M. Fujiogi, and S. Koutsogiannaki, *COVID-19 pathophysiology: A review.* Clinical  
632 immunology, 2020: p. 108427.

633
